# Supplementary material for: Predicting fracture risk in patients with chronic obstructive pulmonary disease: a UK-based population-based cohort study
Source: PubMed Central journal article supplement (PMC6500346; doi:10.1136/bmjopen-2018-024951), 2019-04-03
Supplement: bmjopen-2018-024951supp001.pdf [file bmjopen-2018-024951supp001.pdf]

## Appendix 1

### Read code definitions for selected input variables

| Variable                                         | Read codes                                                                                                                                                                                                                                                                                                                                                                                                                                                                                                                                                                                                                                                      |
|--------------------------------------------------|-----------------------------------------------------------------------------------------------------------------------------------------------------------------------------------------------------------------------------------------------------------------------------------------------------------------------------------------------------------------------------------------------------------------------------------------------------------------------------------------------------------------------------------------------------------------------------------------------------------------------------------------------------------------|
| COPD                                             | H3...00, H3...11, H31..00, H310.00, H310000, H310z00, H311.00, H311000, H311100, H311z00, H312.00, H312000, H312011, H312100, H312300, H312z00, H313.00, H31y.00, H31y100, H31yz00, H31z.00, H32..00, H320.00, H320000, H320100, H320200, H320300, H320311, H320z00, H321.00, H322.00, H32y.00, H32y000, H32y100, H32y111, H32y200, H32yz00, H32z.00, H36..00, H37..00, H38..00, H39..00, H3A..00, H3y..00, H3y..11, H3z..00, H3z..11                                                                                                                                                                                                                           |
| Osteoporosis                                     | 5850.00, 58E4.00, 58E8.00, 58EA.00, 58EE.00, 58EG.00, 58EK.00, 58EM.00, 58ES.00, 58EV.00, 7230A, 7230B, 7230D, 7230PM, 7230PT, N330.00, N330000, N330100, N330200, N330300, N330400, N330500, N330600, N330700, N330800, N330900, N330A00, N330B00, N330C00, N330D00, N330z00, N331200, N331300, N331400, N331500, N331600, N331800, N331900, N331A00, N331B00, N331M00, N331N00, NyuB000, NyuB100, NyuB200, NyuB800                                                                                                                                                                                                                                            |
| Antiresorptive treatment<br>( <i>drug code</i> ) | 97138998, 99158998, 99158997, 97139998, 96920998, 96789998, 93478998, 97140998, 97218998, 93975992, 83457998, 97064992, 83456998, 96897998, 96020992, 96901998, 95879992, 98249990, 97031992, 98581990, 99018990, 98198990, 62945979, 96737998, 97066992, 97051992, 97780990, 98199990, 61594979, 99261990, 96604992, 92004979, 97248990, 99263990, 94089992, 93127992, 94756992, 91526998, 89828998, 88144998, 88144997, 88225998, 89434998, 93502998, 99862998, 95304998, 93228997, 96904998, 93228998, 95304996, 99862997, 95304997, 93228996, 99864998, 91997998, 91998998, 87933998, 81073998, 61612979, 87155998, 87154998, 88542998, 91378998, 82066998, |

Antiresorptive treatment  
(*drug code*)

82065998, 81256998, 81255998, 91190996,  
89518998, 91190998, 91191998, 86599998,  
91190997, 91191997, 93692990, 81472998,  
94276990, 93827990, 92431990, 94161990,  
93610990, 94245990, 61524979, 99883979,  
93828990, 99867979, 95572998, 99758998,  
96764998, 97398992, 95244990, 89367998,  
86562998, 86561998, 87645998, 87644998,  
86079998, 86076998, 91533998, 87151998,  
81270998, 91027998, 93617996, 93618996,  
93618997, 93617997, 90527998, 86566998,  
91028998, 87137998, 87136998, 91674998,  
86564998, 86567998, 87135998, 93089979,  
99357998, 84212998, 84691998, 89021998,  
91764998, 90551998, 91763998, 81869998,  
91764997, 91763997, 89354979, 92813997,  
93402998, 92813998, 98527996, 93403996,  
98527998, 93403998, 93402996, 84531998,  
58602979, 87606998, 85936998, 81112998,  
97865998, 85935998, 81111998, 76983978,  
83078978

## Appendix 2

### METHODS

#### Potential confounders

For smoking status, alcohol use, MRC Dyspnoea scale, and a list of prescription drugs, the most recent record within 1 year (before and after) of index date were used. A BMI record within 2 years (before and after) of index date was used.

Where possible BMI was calculated from height and weight records, for patients with a missing BMI record. The BMI was subsequently categorised (underweight:  $<18.5$  kg/m<sup>2</sup>, normal:  $18.5$ - $<25$  kg/m<sup>2</sup>, overweight:  $25$ - $<30$  kg/m<sup>2</sup>, obese:  $>30$  kg/m<sup>2</sup>).

Having received at least one prescription for inhaled corticosteroids, anti-epileptics, antidepressants, oestrogen-only Hormone Replacement Therapy (HRT) and osteoporosis medications, within 1 year (before and after) of index date were considered as risk factors.

#### Prediction tools – Input variables

The respective variable definitions as outlined in the algorithms for the prediction tools were used.

*Smoking status* – In QFracture<sup>®</sup>, three current smoking categories are provided according to the number of cigarettes smoked daily[1]. To avoid the bias of categorising patients in one of the outlying categories, “current smokers” with no documented number of cigarettes smoked were assigned to the middle category “10-19 cigarettes daily” as done in a recent publication [2]. For FRAX<sup>®</sup>’s two-category smoking status, former smokers were assigned to the “non-smoker” category as was done in the cohorts used to develop FRAX<sup>®</sup>. [3]

*Alcohol consumption* – similarly, for alcohol use in QFracture<sup>®</sup>, alcohol drinkers with no documented unit/day intake were assigned to “moderate (3-6units/day)”.

Missing values for BMI, smoking status, and alcohol use were imputed by multiple imputation using all predictors, resulting in twenty imputed datasets.[4] A complete case sensitivity analysis without imputed variables was also performed (Appendix 3).

## References

- 1 ClinRisk Ltd. QFracture-2016® risk calculator. <http://www.qfracture.org/> (accessed 20 Sep 2017).
- 2 Dagan N, Cohen-Stavi C, Leventer-Roberts M, *et al.* External validation and comparison of three prediction tools for risk of osteoporotic fractures using data from population based electronic health records: retrospective cohort study. *BMJ* 2017;**356**:i6755. doi:10.1136/BMJ.I6755
- 3 Kanis JA, Oden A, Johnell O, *et al.* The use of clinical risk factors enhances the performance of BMD in the prediction of hip and osteoporotic fractures in men and women. *Osteoporos Int* 2007;**18**:1033–46. doi:10.1007/s00198-007-0343-y
- 4 Horton NJ, Lipsitz SR. Multiple Imputation in Practice. *Am Stat* 2001;**55**:244–54. doi:10.1198/000313001317098266

### **Appendix 3**

#### **Fracture risk prediction tools in COPD (Complete case analysis)**

Of the 72,559 patients aged 40-90 years with COPD and no prior diagnosis of osteoporosis or prescription of any anti-resorptive treatment, 41,879 (57.7%) of patients had complete data. Amongst the patients with complete data, 2,649 (6.3%) experienced a MOF and 806 (1.9%) experienced hip fracture.

Both risk tools had about the same discriminatory accuracy as that obtained from the entire cohort with imputed data. The AUC for hip fracture was 75.6%, 95% CI 74.0% to 77.1% for FRAX® and 75.6%, 95% CI 74.0% to 77.2% for QFracture®. FRAX® maintained a higher accuracy for MOF (71.6%, 95% CI 70.6% to 72.6%) than QFracture® (61.1%, 95% CI 60.0% to 62.2%).

## Appendix 4

**Figure E1: Study population flow diagram**

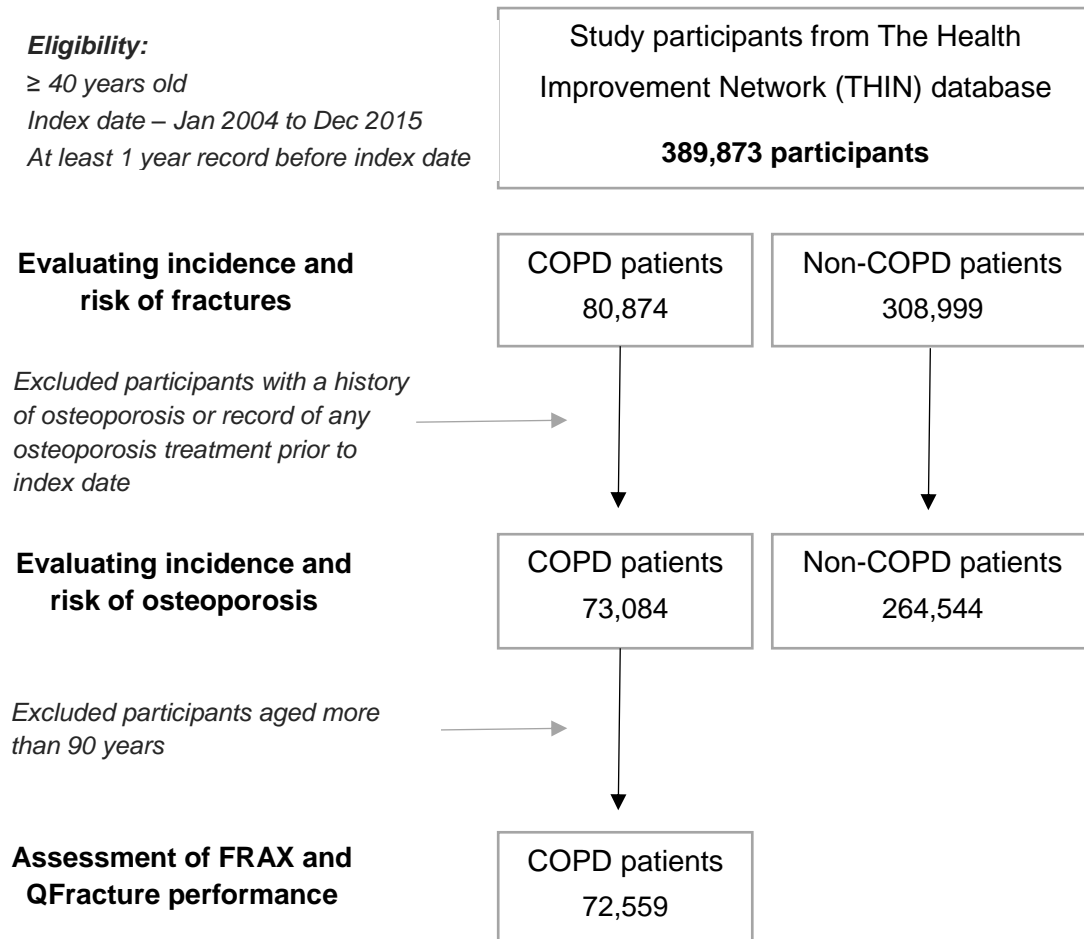

## Appendix 5

**Table E1: Risk of osteoporosis in patients with COPD compared with non-COPD patients**

| Descriptor                                | HR<br>(95% CI)     | Fully adjusted<br>HR (95% CI) |
|-------------------------------------------|--------------------|-------------------------------|
| <b>COPD</b>                               |                    |                               |
| Non-COPD subjects                         | Reference          | Reference                     |
| COPD patients                             | 1.96 (1.87 – 2.06) | 1.13 (1.05 – 1.22)            |
| <b>Charlson Comorbidity Index</b>         |                    |                               |
| Score 0                                   | Reference          | Reference                     |
| Score 1                                   | 1.27 (1.18 – 1.36) | 1.14 (1.06 – 1.23)            |
| Score 2                                   | 1.34 (1.24 – 1.44) | 1.27 (1.17 – 1.37)            |
| Score 3                                   | 1.41 (1.28 – 1.55) | 1.29 (1.17 – 1.42)            |
| Score 4 & more                            | 1.48 (1.33 – 1.64) | 1.44 (1.29 – 1.61)            |
| <b>Body Mass Index (kg/m<sup>2</sup>)</b> |                    |                               |
| Underweight (<18.5)                       | 1.93 (1.64 – 2.27) | 1.91 (1.63 – 2.25)            |
| Normal (18.5 – 24.9)                      | Reference          | Reference                     |
| Overweight (25 – 29.9)                    | 0.64 (0.60 – 0.69) | 0.63 (0.58 – 0.67)            |
| Obese (≥ 30)                              | 0.47 (0.43 – 0.51) | 0.45 (0.41 – 0.48)            |
| No record                                 | 0.50 (0.46 – 0.53) | 0.57 (0.52 – 0.61)            |
| <b>Smoking status</b>                     |                    |                               |
| Never                                     | Reference          | Reference                     |
| Ex                                        | 1.01 (0.95 – 1.08) | 1.02 (0.95 – 1.09)            |
| Current                                   | 1.23 (1.13 – 1.33) | 1.15 (1.06 – 1.25)            |
| Unknown                                   | 0.69 (0.64 – 0.74) | 0.77 (0.71 – 0.83)            |
| <b>Oral Corticosteroid Use</b>            |                    |                               |
| Unexposed                                 | Reference          | Reference                     |
| Exposed                                   | 2.79 (2.56 – 3.05) | 1.91 (1.73 – 2.10)            |
| <b>Inhaled Corticosteroid Use</b>         |                    |                               |
| No                                        | Reference          | Reference                     |
| Yes                                       | 1.35 (1.26 – 1.45) | 1.24 (1.15 – 1.34)            |

HR – Hazard ratio; CI – Confidence interval

HR – Cox regression model derived HR adjusted for age, sex, and GP practice

The fully adjusted Hazard Ratio (aHR) was 1.13, 95% CI 1.05 to 1.22, p<0.0001 – the multivariable Cox regression model derived aHR was adjusted for age, sex, GP practice, Charlson comorbidity index, body mass index, smoking status, inhaled corticosteroid use, and cumulative oral corticosteroid use.

## Appendix 6

**Table E2: Baseline characteristics of patients with COPD aged 40-90 years with no prior diagnosis of osteoporosis or prescription of any anti-resorptive treatment**

| Descriptor                                                  | COPD patients     |      |
|-------------------------------------------------------------|-------------------|------|
|                                                             | <i>n</i> = 72,559 | %    |
| <b>Mean age at index date (years, SD)</b>                   | 66.1 (10.7)       |      |
| <b>Sex</b>                                                  |                   |      |
| Female                                                      | 31,885            | 43.9 |
| <b>MRC Dyspnoea Scale (1 Year either side of diagnosis)</b> |                   |      |
| 1                                                           | 8,882             | 12.2 |
| 2                                                           | 17,718            | 24.4 |
| 3                                                           | 9,257             | 12.8 |
| 4 & 5                                                       | 4,346             | 6.0  |
| No record                                                   | 32,356            | 44.6 |
| <b>Charlson Comorbidity Index Score</b>                     |                   |      |
| 0                                                           | 0                 | 0    |
| 1                                                           | 38,573            | 53.2 |
| 2                                                           | 11,953            | 16.5 |
| 3                                                           | 11,110            | 15.3 |
| ≥ 4                                                         | 10,923            | 15.1 |
| <b>Body Mass Index (BMI) (kg/m<sup>2</sup>)</b>             |                   |      |
| Underweight (< 18.5)                                        | 2,730             | 3.8  |
| Normal (18.5 – 24.9)                                        | 21,791            | 30.0 |
| Overweight (25 – 29.9)                                      | 21,504            | 29.6 |
| Obese (≥30)                                                 | 17,627            | 24.3 |
| No BMI                                                      | 8,907             | 12.3 |
| <b>Smoking status (1 Year either side of diagnosis)</b>     |                   |      |
| Never smoked                                                | 7,062             | 9.7  |
| Ex-smoker                                                   | 33,810            | 46.6 |
| Current smoker                                              | 29,949            | 41.3 |
| Unknown                                                     | 1,738             | 2.4  |
